# Supplementary material for: Personalisation of the Dutch combined lifestyle intervention SLIMMER improves participant retention and weight-loss in people at risk for cardiometabolic disease
Source: Research Square preprint supplement (doi:10.21203/rs.3.rs-6530079/v1), 2025-05-13
Supplement: Supplementary file 1 [file ca7a5810ec205f3621fb220c.docx]

**Supplementary document 1: questionnaires to determine quality of life, adherence to lifestyle advice and appreciation of combined lifestyle program**

| **Questionnaire** | **Type of questions** | **Answers** |
| --- | --- | --- |
| EQ-5D | 6 multiple choice questions about experience of own subjective health and quality of life at month 0, 3 and 6 | 5 possible answers from ‘no problems’ to ‘extreme problems’ and Visual Analogue Scale from 0-100 |
| Eetscore/Dutch Healthy Diet Index (DHDI) | 40 multiple choice questions on diet quality and adherence to Dutch dietary guidelines, based on 16 food items, resulting in 16 scores for each food item (0-10) and a total score (0-160, higher score is better diet quality) at month 0, 3 and 6 | 2 to 7 possible answers |
| Subjective compliance and effort  (included in this Supplementary) | 11 multiple choice questions about self-efficacy (all time points) and 5 multiple choice questions focusing on behavior change and behavior maintenance for physical activity and diet at month 3 and month 6. The intervention group had an additional 6 multiple choice questions related to aspects of the personalization. | 5 possible answers and 7 points Likert scale |
| Appreciation  (included in this Supplementary) | 13 multiple choice questions evaluating the SLIMMER program which was evaluated only at month 6. The intervention group had an additional 4 multiple choice questions related to aspects of the personalization. | 1 overall rating from 1-10 and 7 points Likert scale |

**Questionnaire subjective compliance and effort (translated from Dutch)**

Month 0, month 3 and month 6

Suppose you are advised to do the things below this week. Please indicate your degree of confidence to do the following:

1. Initiate a new or a different exercise program

| Never able |  |  |  |  |  | Absolutely able |
| --- | --- | --- | --- | --- | --- | --- |
|  |  |  |  |  |  |  |

2. Changing your physical activity habits

| Never able |  |  |  |  |  | Absolutely able |
| --- | --- | --- | --- | --- | --- | --- |
|  |  |  |  |  |  |  |

3. Maintaining a new physical activity pattern in difficult moments

| Never able |  |  |  |  |  | Absolutely able |
| --- | --- | --- | --- | --- | --- | --- |
|  |  |  |  |  |  |  |

4. Keep doing physical activity even if they are difficult

| Never able |  |  |  |  |  | Absolutely able |
| --- | --- | --- | --- | --- | --- | --- |
|  |  |  |  |  |  |  |

5. Doing physical activity for the designated length of time

| Never able |  |  |  |  |  | Absolutely able |
| --- | --- | --- | --- | --- | --- | --- |
|  |  |  |  |  |  |  |

6. Starting a new diet

| Never able |  |  |  |  |  | Absolutely able |
| --- | --- | --- | --- | --- | --- | --- |
|  |  |  |  |  |  |  |

7. Adjusting your dietary habits

| Never able |  |  |  |  |  | Absolutely able |
| --- | --- | --- | --- | --- | --- | --- |
|  |  |  |  |  |  |  |

8. Changing your diet so that it contains less calories

| Never able |  |  |  |  |  | Absolutely able |
| --- | --- | --- | --- | --- | --- | --- |
|  |  |  |  |  |  |  |

9. Maintaining a new diet in difficult moments

| Never able |  |  |  |  |  | Absolutely able |
| --- | --- | --- | --- | --- | --- | --- |
|  |  |  |  |  |  |  |

10. Do you practice physical activity regularly at the moment? [*Regular physical activity is defined as moderate exercise for 30 minutes on at least 5 days, but preferably 7 days a week*]

From the following five answer options, choose the option that best represents your current physical activity pattern and your willingness to exercise:

1. No, and I have no intention of starting to do so in the next six months.

2. No, but I plan to start doing that in the next six months.

3. No. I do exercise, but not regularly.

4. Yes. I started doing regular exercise in the past 6 months.

5. Yes and I've been regular exercising for more than 6 months.

11. Do you currently have a healthy diet? [*A healthy diet is defined as eating according to Dutch Healthy Eating guidelines and using limited concentrations of salt (source: Nutrition Center)*]

From the following five answer options, choose the option that best represents your current eating pattern and your willingness to have a healthy eating pattern:

1. No, and I have no intention of starting to do so in the next six months.

2. No, but I plan to start doing that in the next six months.

3. No. I eat healthy from time to time, but not regularly.

4. Yes. I started eating healthy in the past 6 months.

5. Yes and I've been eating healthy for more than 6 months.

**Questions on month 3 and month 6 (translated from Dutch)**

12. How often did you spend on the SLIMMER program in the past month?

1. Each day
2. 2-3 times a week
3. once a week
4. 1-2 times a month
5. less than once a month
6. Not at all

13. How many times have you used the application on average in the last month? **[intervention group only]**

1. Multiple times a day
2. (almost) every day
3. 3-5 times a week
4. 1-2 times a week
5. 1-2 times a month
6. Less than once a month
7. Not at all

14. How many times have you implemented the goals you have set in the past month? **[intervention group only]**

| Rarely |  |  |  |  |  | Very often |
| --- | --- | --- | --- | --- | --- | --- |
|  |  |  |  |  |  |  |

15. How often did you successfully follow the nutritional advice of the SLIMMER program in the past month?

| Rarely |  |  |  |  |  | Very often |
| --- | --- | --- | --- | --- | --- | --- |
|  |  |  |  |  |  |  |

16. How easy or difficult did you find it to adhere to the dietician's advice?

| Very easy |  |  |  |  |  | Very difficult |
| --- | --- | --- | --- | --- | --- | --- |
|  |  |  |  |  |  |  |

17. How easy or difficult did you find it to adhere to the advice of the physiotherapist?

| Very easy |  |  |  |  |  | Very difficult |
| --- | --- | --- | --- | --- | --- | --- |
|  |  |  |  |  |  |  |

18. How easy or difficult was it to set an exercise goal? **[intervention group only]**

| Very easy |  |  |  |  |  | Very difficult |
| --- | --- | --- | --- | --- | --- | --- |
|  |  |  |  |  |  |  |

19. How easy or difficult was it to set a nutrition goal? **[intervention group only]**

| Very easy |  |  |  |  |  | Very difficult |
| --- | --- | --- | --- | --- | --- | --- |
|  |  |  |  |  |  |  |

20. How easy or difficult did you find it to stick to your nutrition goal? **[intervention group only]**

| Very easy |  |  |  |  |  | Very difficult |
| --- | --- | --- | --- | --- | --- | --- |
|  |  |  |  |  |  |  |

21. How easy or difficult did you find it to stick to your exercise goal? **[intervention group only]**

| Very easy |  |  |  |  |  | Very difficult |
| --- | --- | --- | --- | --- | --- | --- |
|  |  |  |  |  |  |  |

22. How easy or difficult did you find it to maintain your own goal for a longer period of time?

| Very easy |  |  |  |  |  | Very difficult |
| --- | --- | --- | --- | --- | --- | --- |
|  |  |  |  |  |  |  |

**Appreciation questionnaire at 6 months (translated from Dutch)**

1.What grade do you give to the combined lifestyle program you participated on in the past 6 months on a scale of 1-10?

2. How much did you enjoy the combined lifestyle program?

| Very much |  |  |  |  |  | Not at all |
| --- | --- | --- | --- | --- | --- | --- |
|  |  |  |  |  |  |  |

3. How difficult was it to understand the content of the combined lifestyle program?

| Very easy |  |  |  |  |  | Very difficult |
| --- | --- | --- | --- | --- | --- | --- |
|  |  |  |  |  |  |  |

4. How difficult was it to implement the combined lifestyle program?

| Very easy |  |  |  |  |  | Very hard |
| --- | --- | --- | --- | --- | --- | --- |
|  |  |  |  |  |  |  |

5. To what extent did you find the information from this program interesting?

| Not at all |  |  |  |  |  | Very interesting |
| --- | --- | --- | --- | --- | --- | --- |
|  |  |  |  |  |  |  |

6. What did you think of the quality of this program?

| Very poor |  |  |  |  |  | Excellent quality |
| --- | --- | --- | --- | --- | --- | --- |
|  |  |  |  |  |  |  |

7. To what extent would you recommend this program?

| Not at all |  |  |  |  |  | For sure |
| --- | --- | --- | --- | --- | --- | --- |
|  |  |  |  |  |  |  |

8. To what extent would you follow a similar program again?

| Not at all |  |  |  |  |  | For sure |
| --- | --- | --- | --- | --- | --- | --- |
|  |  |  |  |  |  |  |

9. How useful did you find the nutrition and exercise advice?

| Not at all |  |  |  |  |  | Very useful |
| --- | --- | --- | --- | --- | --- | --- |
|  |  |  |  |  |  |  |

10. How relevant did you find the nutrition and exercise advice?

| Not at all |  |  |  |  |  | Very relevant |
| --- | --- | --- | --- | --- | --- | --- |
|  |  |  |  |  |  |  |

11. To what extent did you feel free in choosing your nutritional goals?

| Not at all |  |  |  |  |  | Very free |
| --- | --- | --- | --- | --- | --- | --- |
|  |  |  |  |  |  |  |

12. To what extent did you feel free when choosing your exercise goals?

| Not at all |  |  |  |  |  | Very free |
| --- | --- | --- | --- | --- | --- | --- |
|  |  |  |  |  |  |  |

13. I enjoyed participating in this research

| Not at all |  |  |  |  |  | Very much |
| --- | --- | --- | --- | --- | --- | --- |
|  |  |  |  |  |  |  |

**Questions for intervention group only:**

14. How difficult was it to learn how the TNO application worked?

| Not at all |  |  |  |  |  | Very difficult |
| --- | --- | --- | --- | --- | --- | --- |
|  |  |  |  |  |  |  |

15. How useful did you find the TNO application?

| Very useful |  |  |  |  |  | Not at all useful |
| --- | --- | --- | --- | --- | --- | --- |
|  |  |  |  |  |  |  |

16. To what extent did you feel supported by the TNO application in achieving your goals?

| Not at all |  |  |  |  |  | Very much |
| --- | --- | --- | --- | --- | --- | --- |
|  |  |  |  |  |  |  |

17. To what extent did the TNO application have added value for you?

| Not at all |  |  |  |  |  | Very much |
| --- | --- | --- | --- | --- | --- | --- |
|  |  |  |  |  |  |  |
